# Supplementary material for: Multiplexed analysis of signalling proteins at the single-immune cell level
Source: Royal Society of Chemistry journal article supplement (doi:10.1039/d2lc00891b), 2022-12-15
Supplement: d2lc00891b1.pdf [file d2lc00891b1.pdf]

# Supplementary information

## **Multiplexed analysis of signalling proteins at the single-immune cell level**

Claudius L. Dietsche<sup>a</sup>, Elisabeth Hirth<sup>a</sup>, and Petra S. Dittrich<sup>a,\*</sup>

*ETH Zurich, Department of Biosystems and Engineering, Mattenstrasse 26, 4125 Basel, Switzerland*

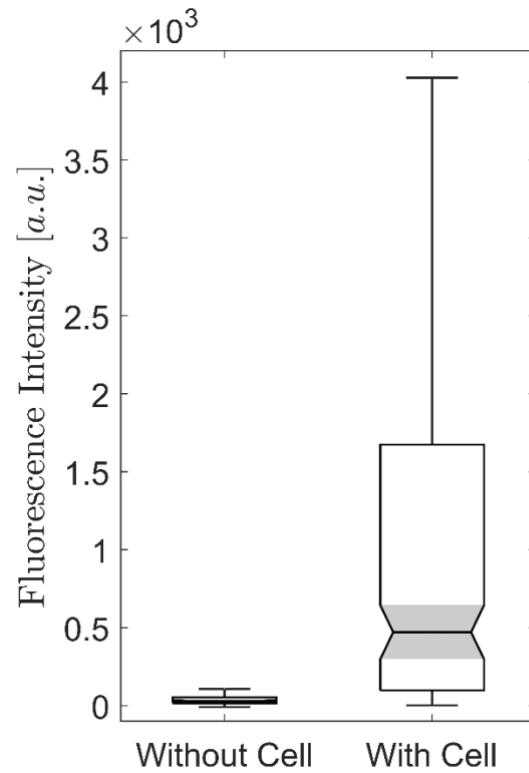

**Figure S1.** Protein secretion measured in chambers containing at least one cell compared to chambers containing no cell in the same microfluidic chip. The signal in chambers without a cell is very low. We also do not observe diffusion of analytes from a cell-occupied chamber to an adjacent empty chamber, when the pneumatic valves are closed.

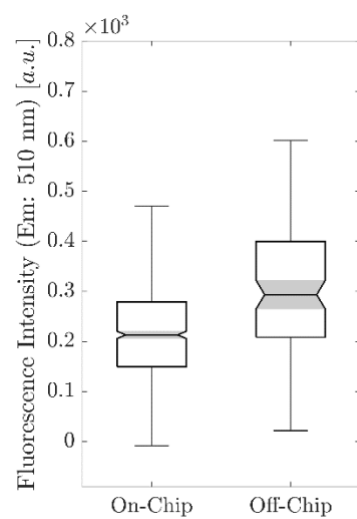

**Figure S2.** The ROS level in the cells was measured in bulk (off-chip) and in the microchambers (on-chip) with CellROX™ Green.

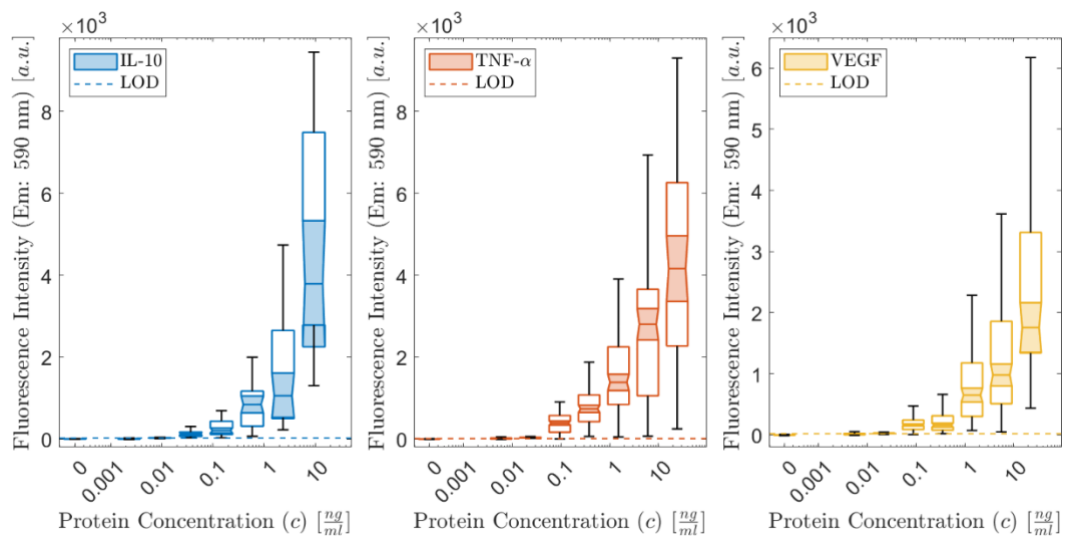

**Figure S3.** Calibration curves of the three target proteins measured in a volume of 50  $\mu$ l on a plate reader. The LODs of the proteins are 0.015 ng/ml, 0.01 ng/ml, and 0.015 ng/ml for IL-10, TNF- $\alpha$ , and VEGF, respectively.

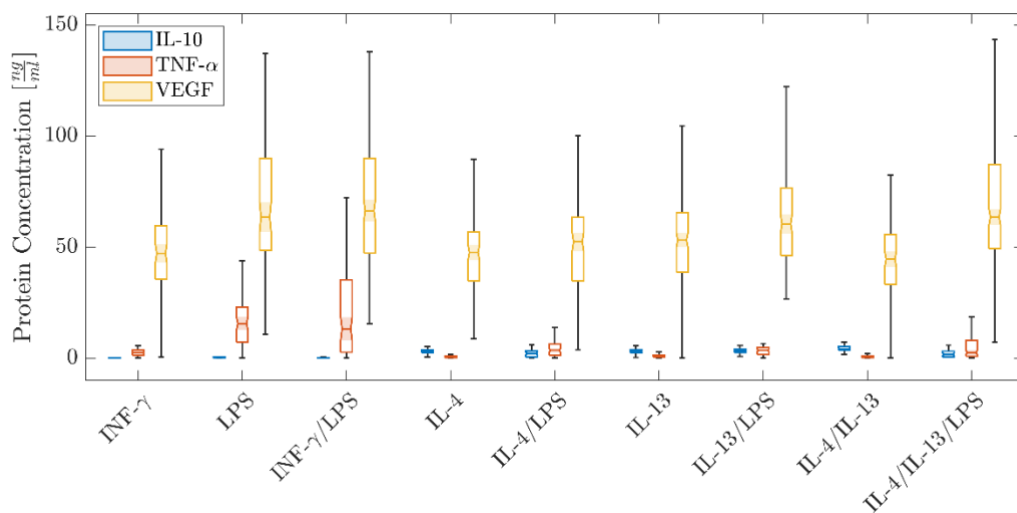

**Figure S4.** Secretion of IL-10, TNF- $\alpha$  and VEGF from macrophages polarized with different compounds according to the protocol in the main manuscript.

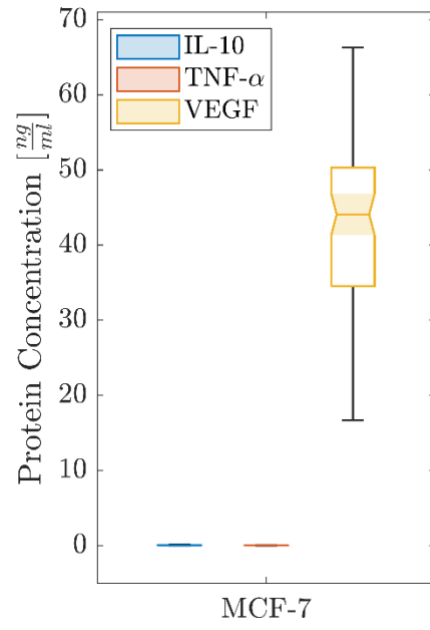

**Figure S5.** *Off-chip* secretome analysis of the breast cancer cell line MCF-7.

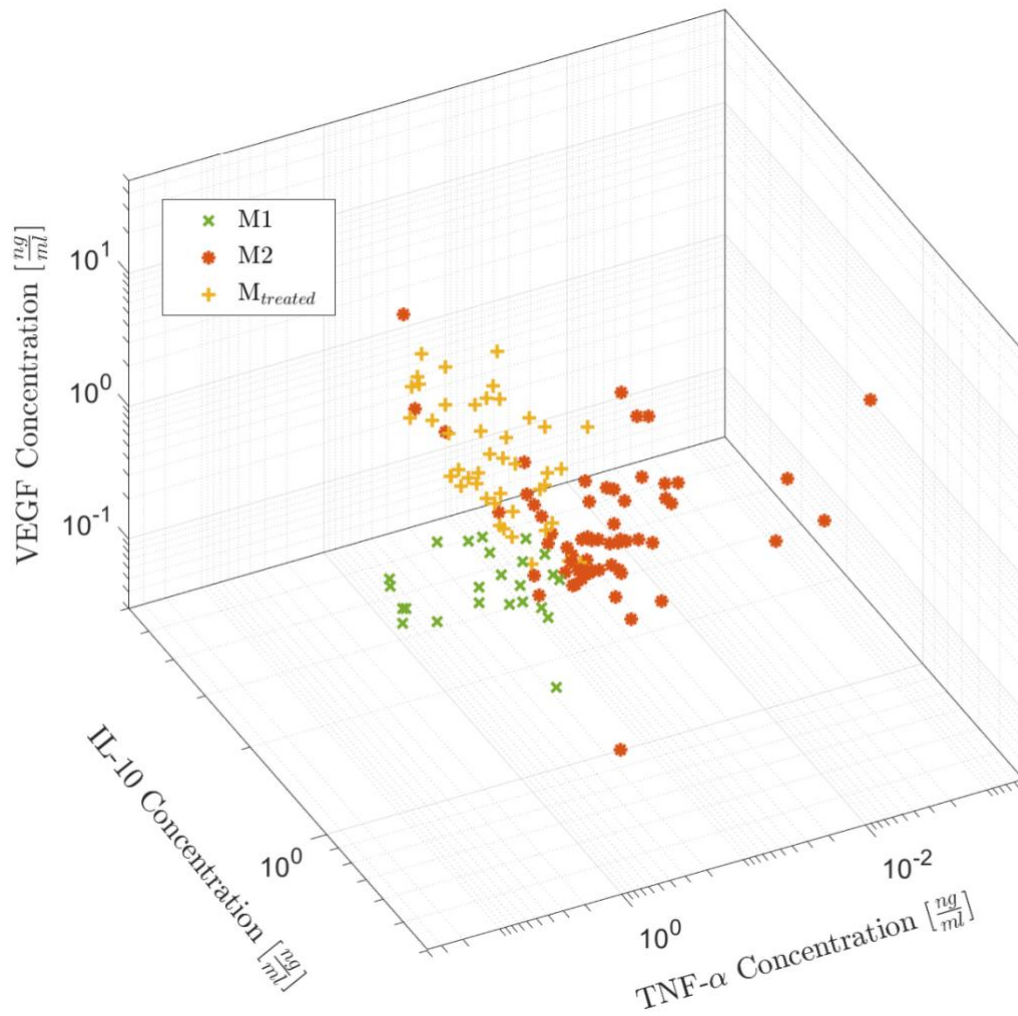

**Figure S6.** Single-cell secretion profile of polarized macrophages and macrophages treated with supernatant from cancer cells (M<sub>treated</sub>). The secretion levels of macrophages are depicted for microchambers, where a single cell was co-encapsulated with all three types of beads. Green symbols: M1-polarized macrophages (n=24), red symbols: M2-polarized macrophages (n=68), yellow symbols: M<sub>treated</sub> (n=45).

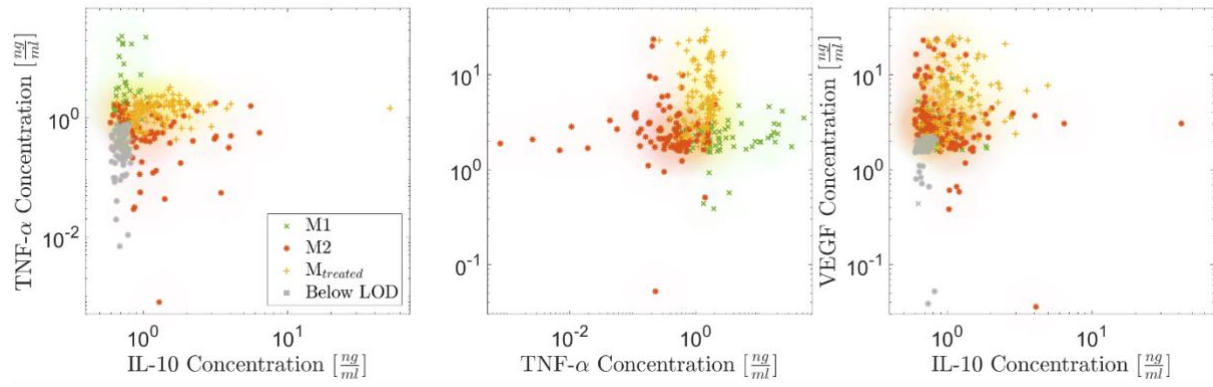

**Figure S7.** Multiplex expression of the proteins from single macrophages. The plotted data is the same data as in Figure 6c-e including all the outliers.
